# Supplementary material for: Changes in Diversity and Composition of Rhizosphere Bacterial and Fungal Community between Resistant and Susceptible Pakchoi under Plasmodiophora brassicae
Source: MDPI journal article supplement (doi:10.3390/ijms242316779), 2023-11-26
Supplement: s1 [file s1]

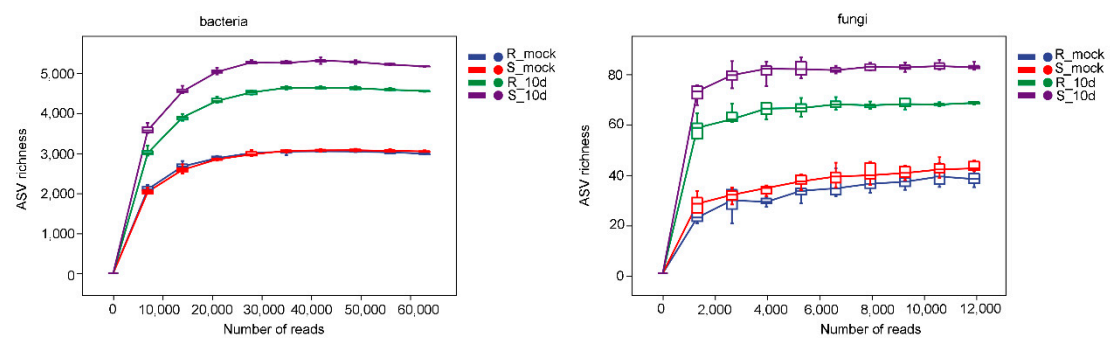

Figure S1 Sample-based rarefaction curves for 16S and ITS data showing accumulated sampled diversity.

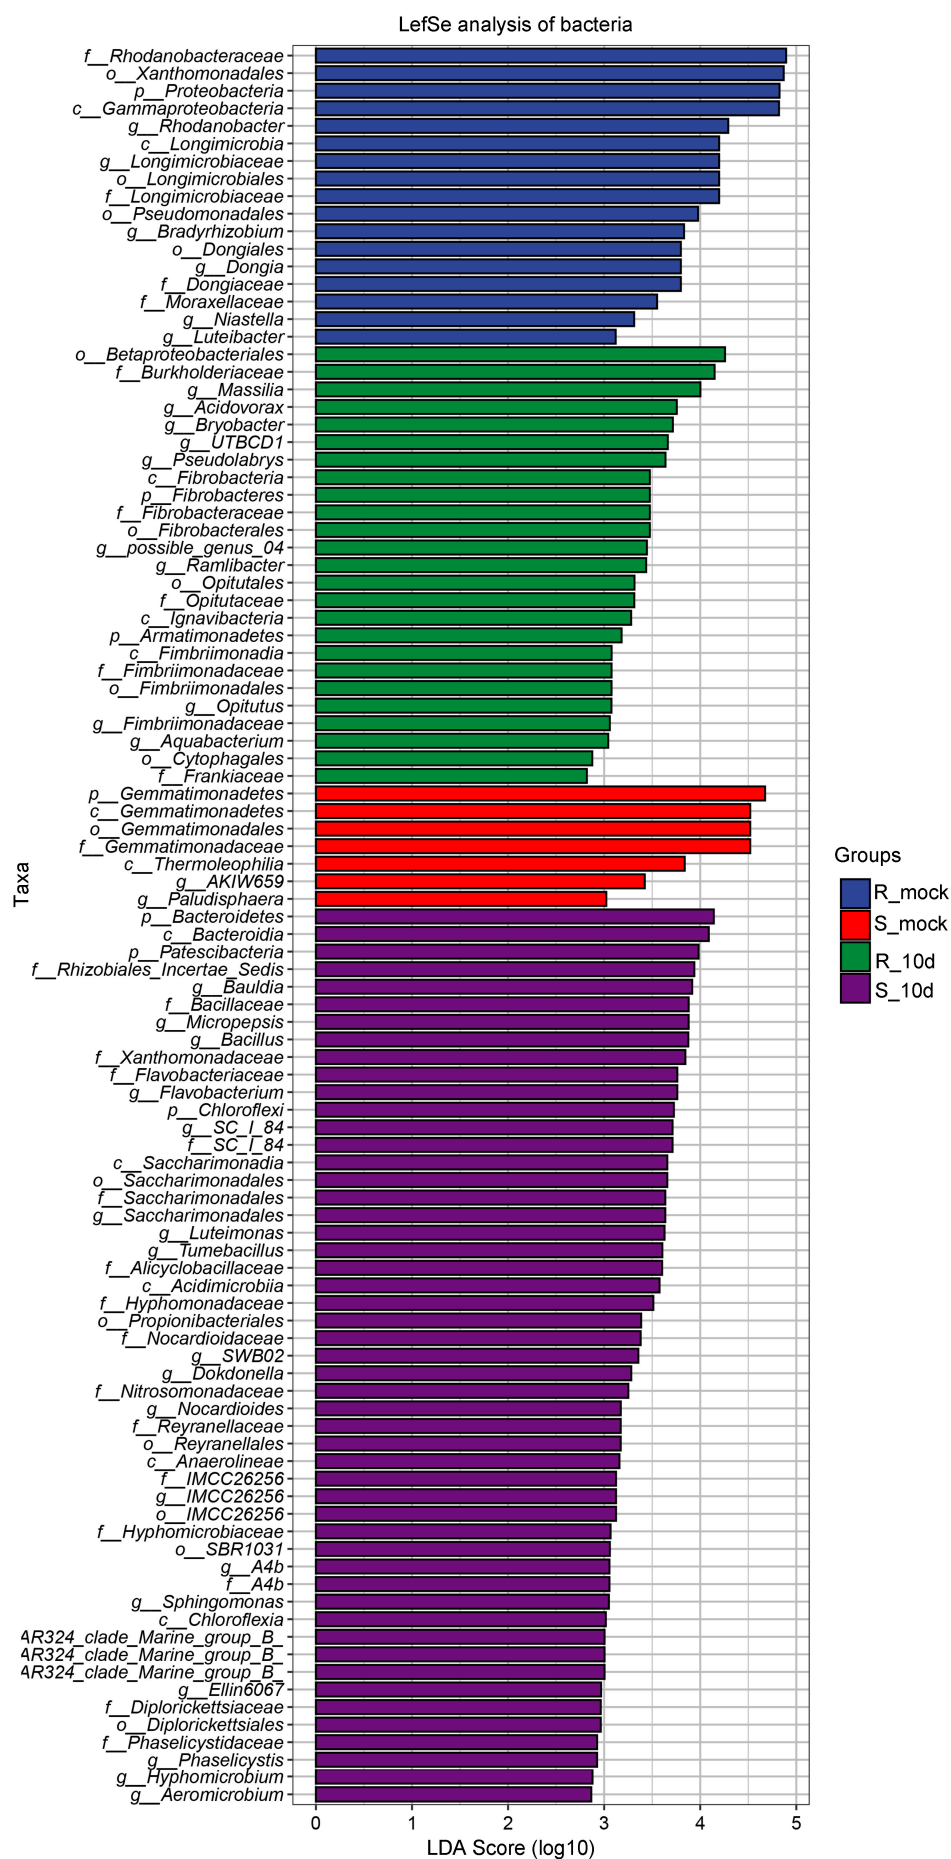

Figure S2. LefSe analysis of bacteria at. LDA score  $\geq 2.82$ .

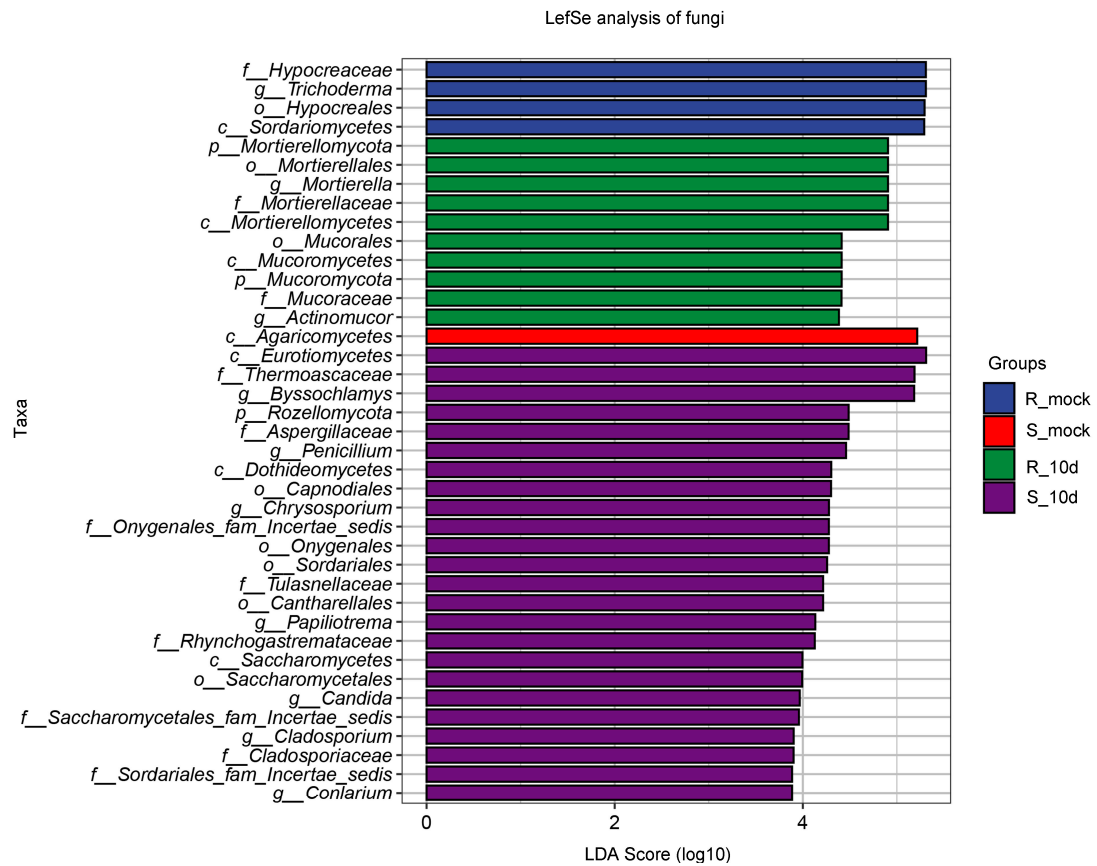

Figure S3. LefSe analysis of fungi. LDA score  $\geq 2$ .
